# Supplementary material
Source: Springer Nature journal article supplement (https://www.springermedizin.de/resource/supplementary/12874_2010_492_MOESM8_ESM.pdf/9432214)
Supplement: MOESM8 [file 9432214]

## Outcomes with benefit of class 1a antiarrhythmics for maintaining sinus rhythm after cardioversion of atrial fibrillation

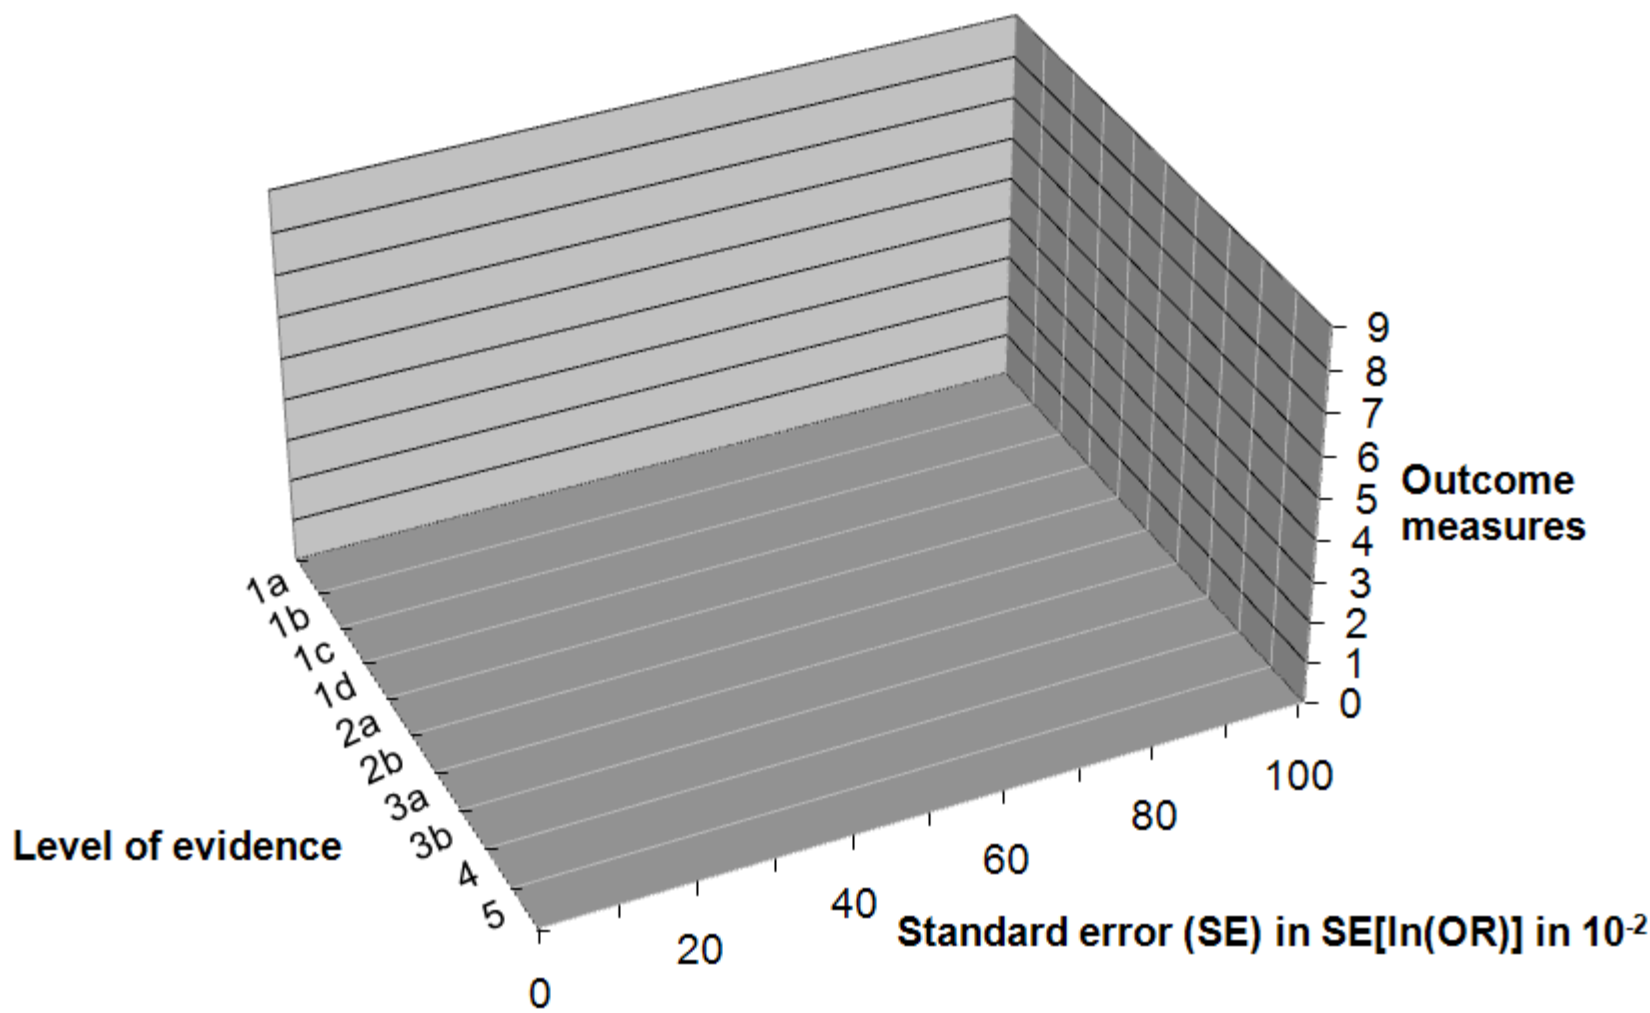

all-cause mortality

## Outcomes with harm of class 1a antiarrhythmics for maintaining sinus rhythm after cardioversion of atrial fibrillation

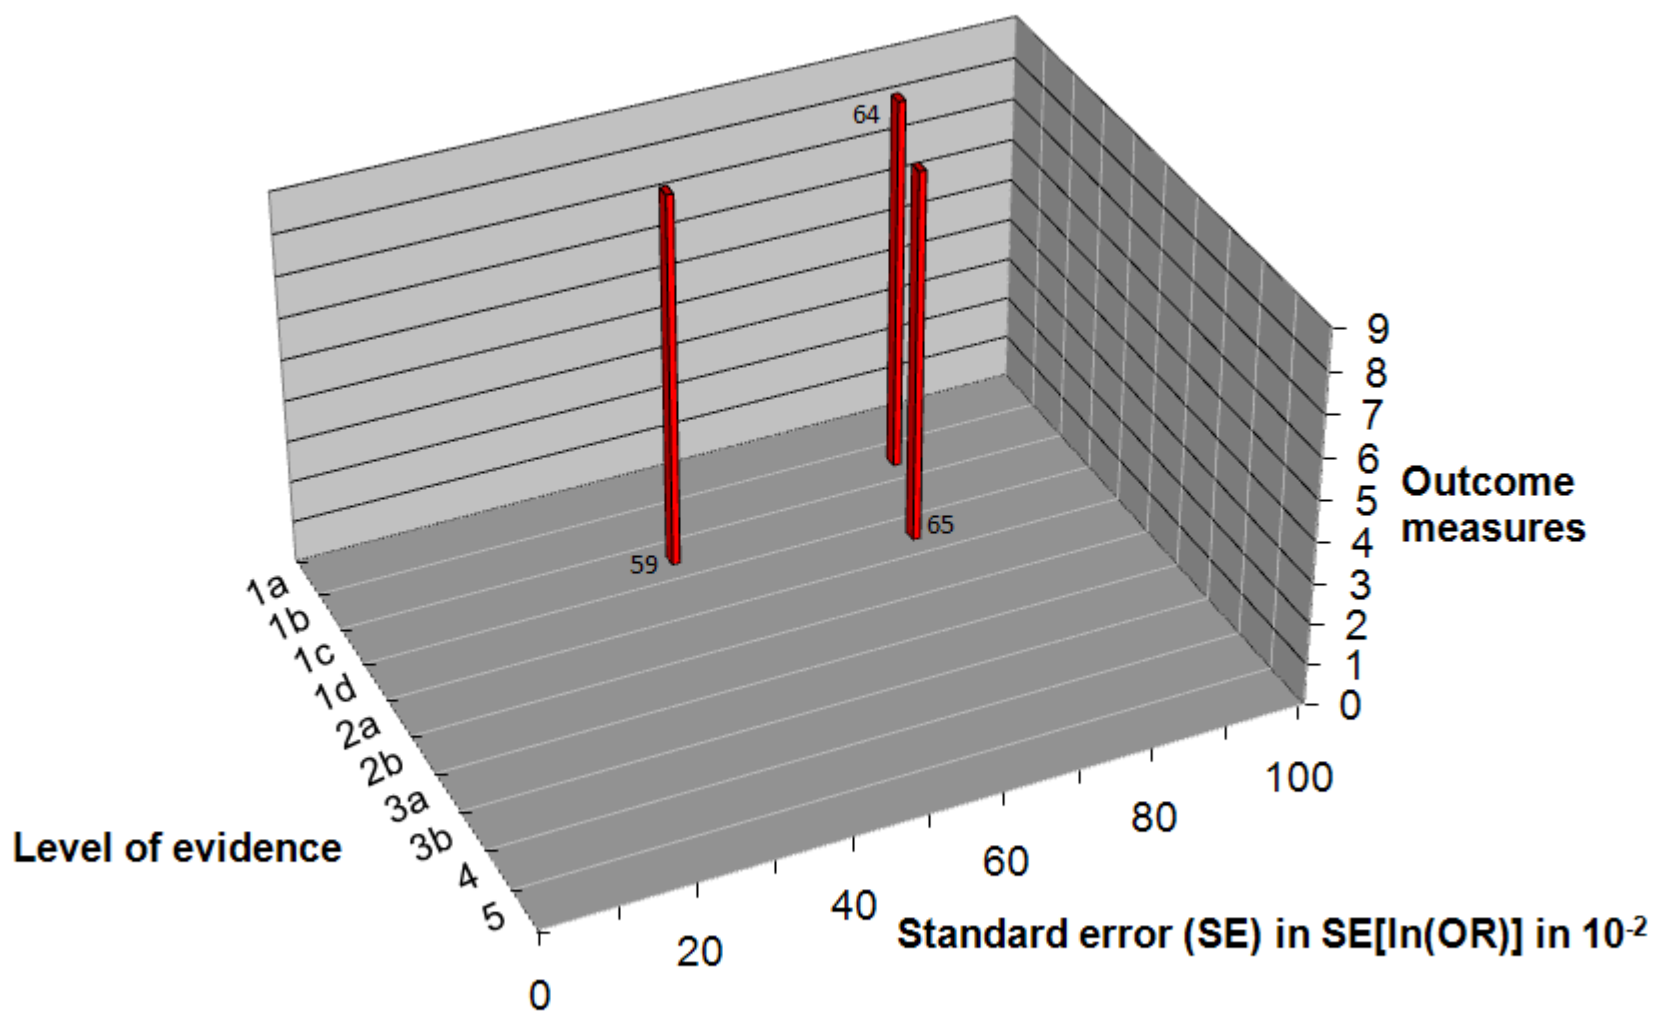

all-cause mortality
